# Supplementary material for: Nano-SiO2 coating enabled uniform Na stripping/plating for dendrite-free and long-life sodium metal batteries
Source: Royal Society of Chemistry journal article supplement (doi:10.1039/c9na00658c), 2019-01-01
Supplement: c9na00658c1.pdf [file c9na00658c1.pdf]

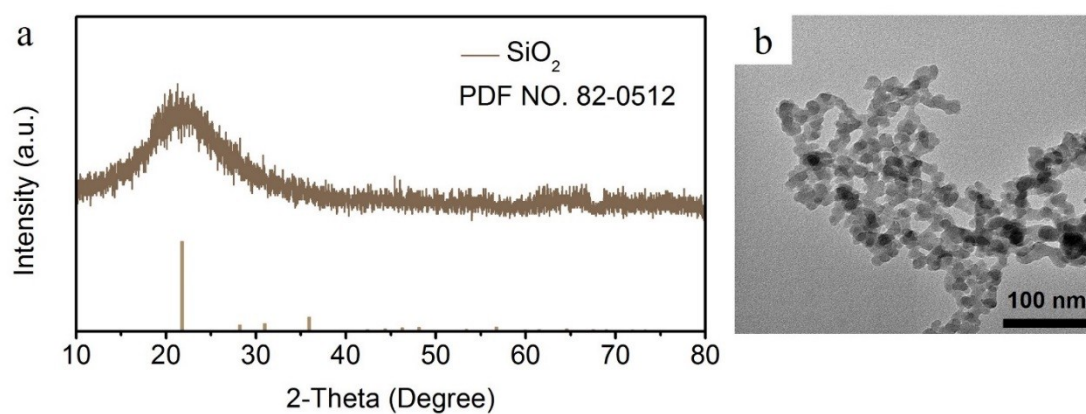

Fig. S1. (a) The XRD of hydrophobic SiO<sub>2</sub>. (b) TEM image of nano SiO<sub>2</sub>.

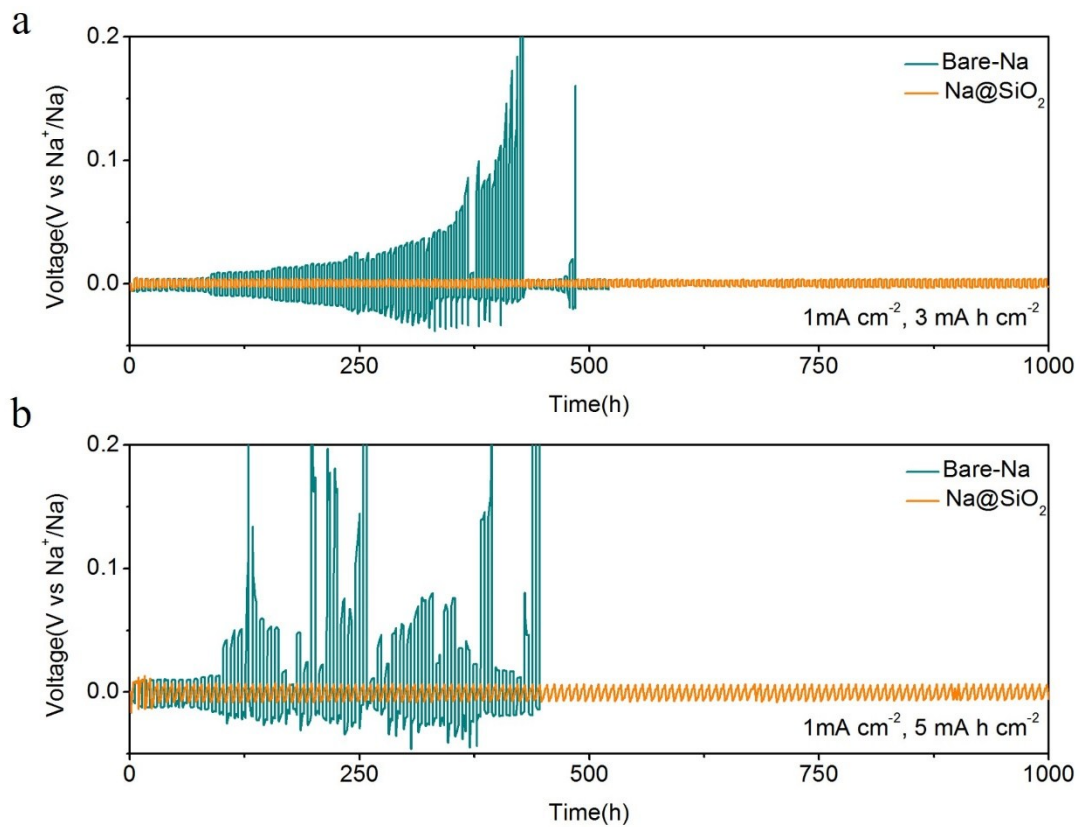

Fig. S2. Comparison of the cycling stability of Na@SiO<sub>2</sub> composite electrodes and bare Na symmetrical cells at 1 mA cm<sup>-2</sup> with a stripping/plating capacity of (a) 3 mA h cm<sup>-2</sup> and (b) 5 mA h cm<sup>-2</sup> in 1M NaPF<sub>6</sub>/diglyme electrolyte.

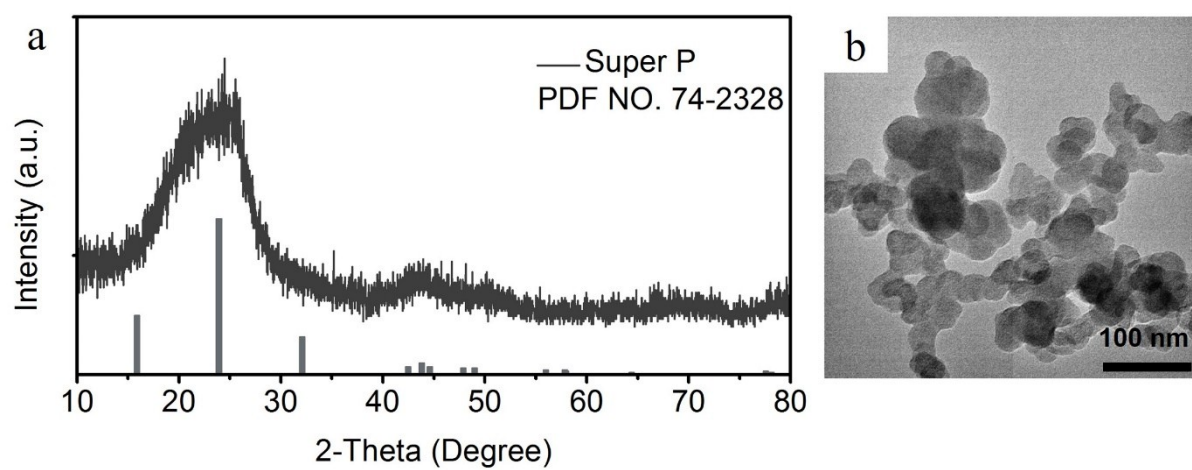

Fig. S3. (a) The XRD of Super P. (b) TEM image of Super P.

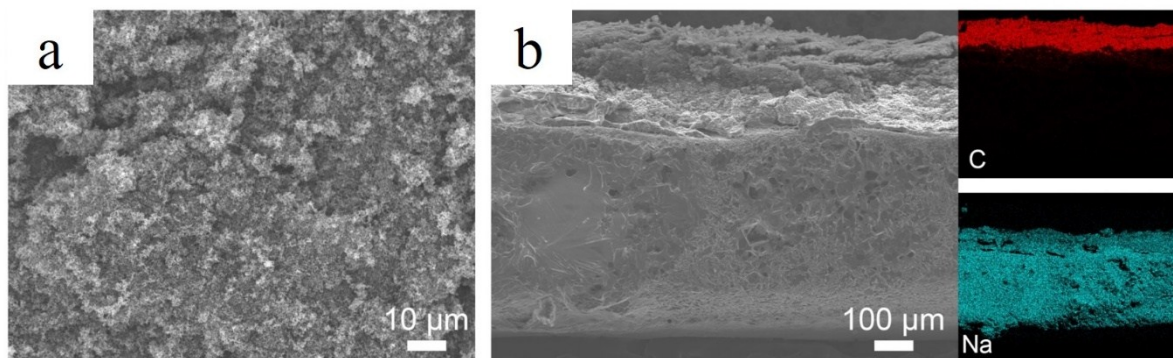

Fig. S4. (a) Top-view SEM image of Na@Super P electrode. (b) cross-sectional SEM image of Na@Super P electrode and the corresponding EDX elemental mappings of C and Na.

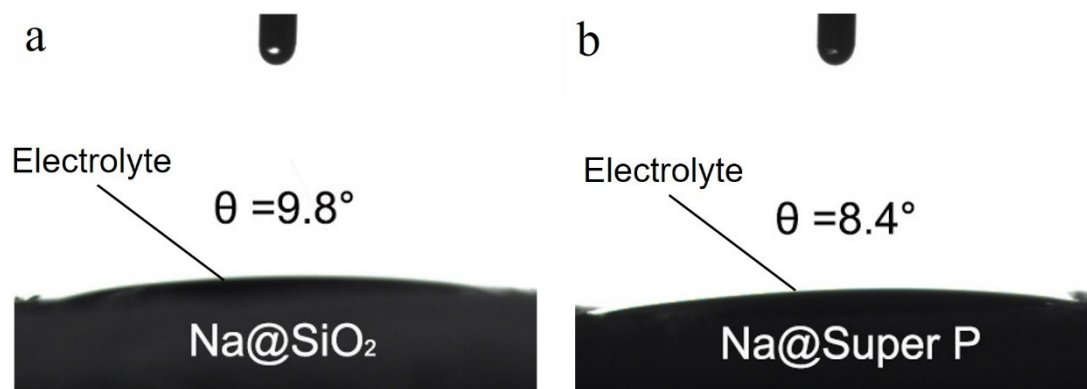

Fig. S5. Contact angles of NaPF<sub>6</sub>/diglyme electrolyte on (a) Na@SiO<sub>2</sub> electrodes and (b) Na@Super P electrodes, respectively.

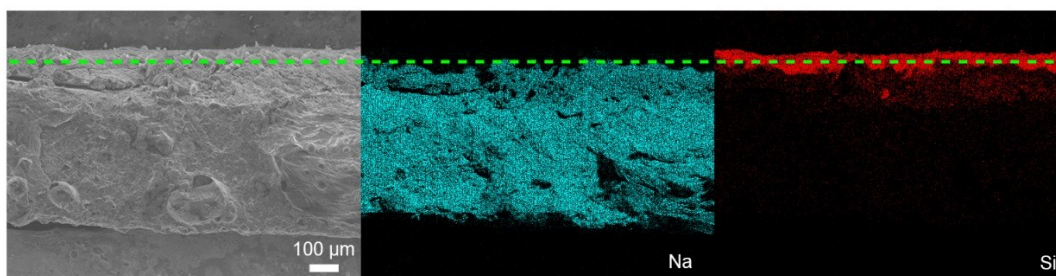

Fig. S6. Cross-sectional SEM image of Na@SiO<sub>2</sub> electrode and corresponding EDX elemental mappings of Si and Na after 50 cycles.

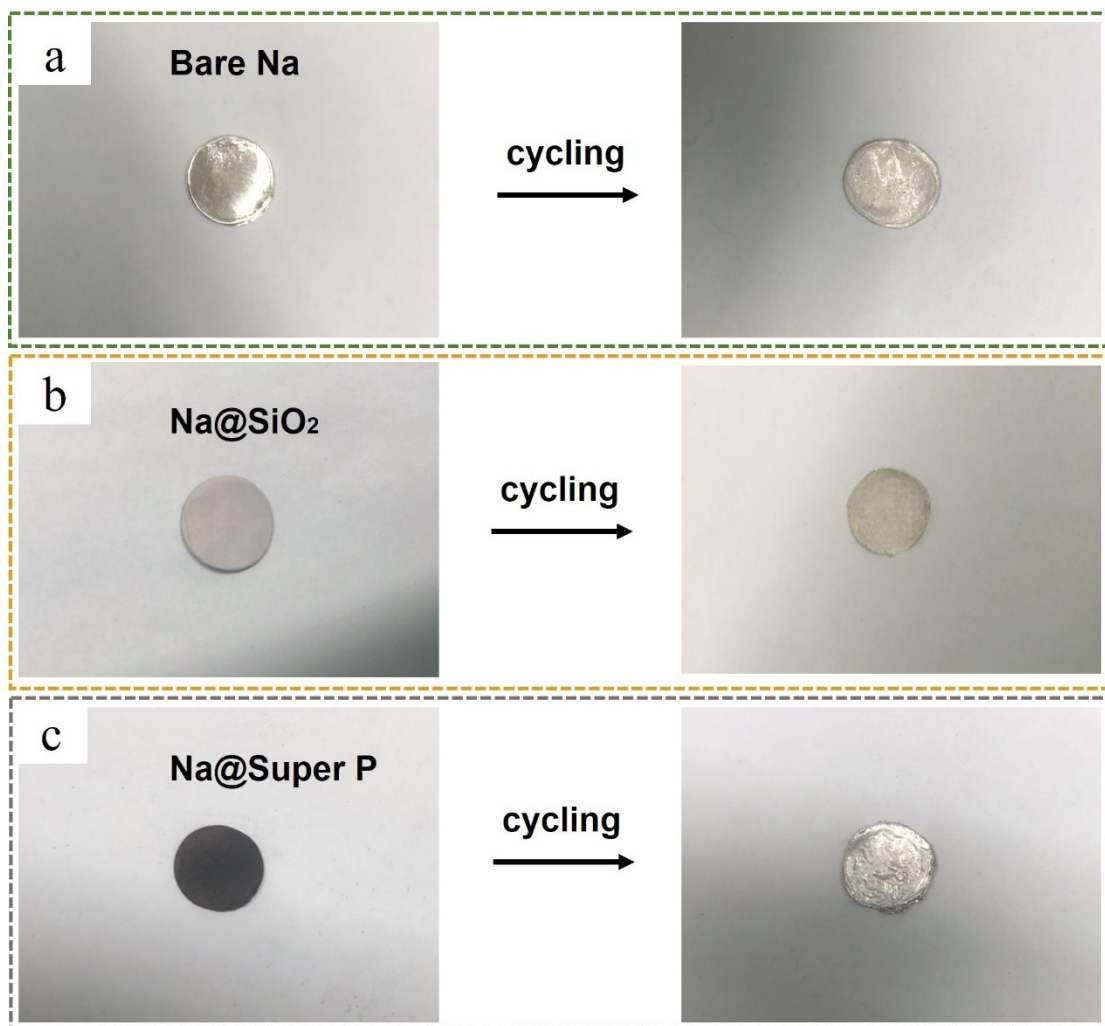

Fig. S7. Digital images of bare Na, Na@SiO<sub>2</sub> and Na@Super P electrode before and after cycling. (a) Bare Na. (b) Na@SiO<sub>2</sub>. (c) Na@Super P.

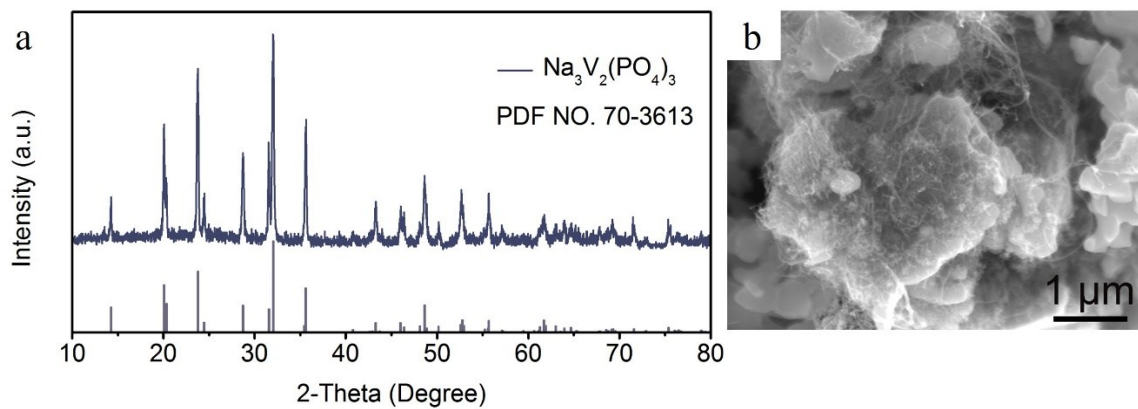

Fig. S8. (a) The XRD of NVP cathode fabricated by a sol-gel method. (b) SEM image of NVP cathode.



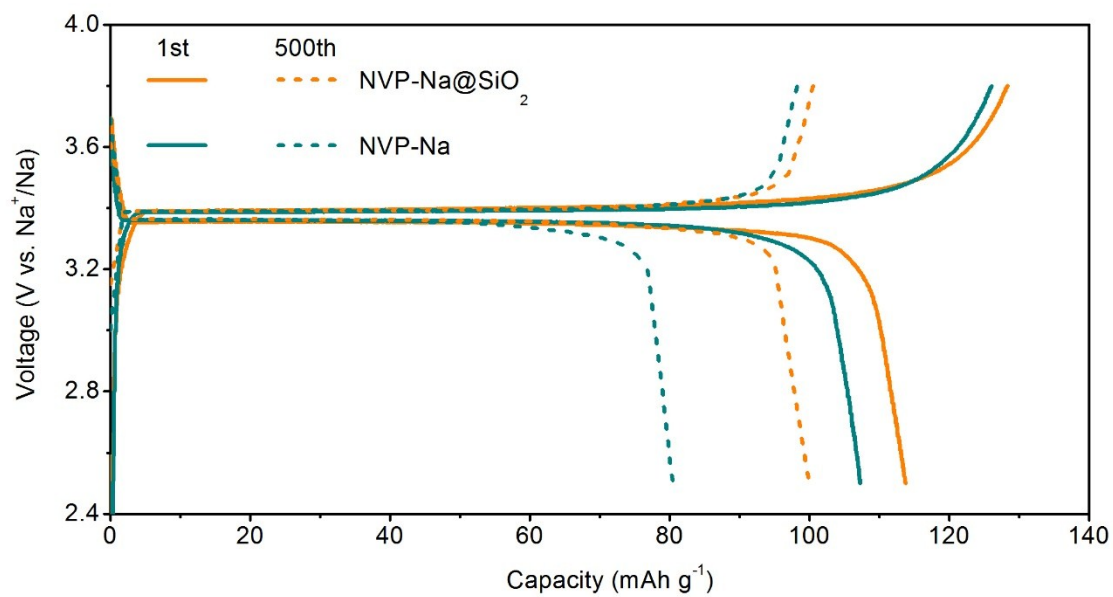

Fig. S9. Voltage profiles of the full batteries with bare Na or Na@SiO<sub>2</sub> as anodes and NVP as cathode at 1 C.
